# Supplementary material for: Melatonin Alleviates Diquat-Induced Acute Liver Injury by Inhibiting Oxidative Stress and Ferroptosis via Activation of the Nrf2/HO-1 Pathway
Source: Research Square preprint supplement (doi:10.21203/rs.3.rs-7949941/v1), 2025-12-01
Supplement: Supplementary file 1 [file 11db33acf8bca9779d9364da.docx]

**Table 1. Real-time PCR primer sequences**

| Gene | Forward Primer(5'-3') | Reverse Primer(5'-3') |
| --- | --- | --- |
| GPX4 | CCTCTGCTGCAAGAGCCTCCC | CTTATCCAGGCAGACCATGTGC |
| ACSL4 | CCTTTGGCTCATGTGCTGGAAC | GCCATAAGTGTGGGTTTCAGTAC |
| TFR1 | GAAGTCCAGTGTGGGAACAAGGT | CAACCACTCAGTGGCACCAACA |
| GAPDH | ACTCCACTCACGGCAAATTC | TCTCCATGGTGAAGACA |
